# Supplementary material for: Impact of Electricity Consumption on Manufacturing Output in Nigeria From 1980 – 2021
Source: Research Square preprint supplement (doi:10.21203/rs.3.rs-2134279/v1), 2022-10-07
Supplement: Supplementary file 1 [file ab7f615e4d116a5e5fba03e4.docx]

**Appendix**

**Table 2.1 Trend of Electricity Consumption in Nigeria from 1980 - 2016**

| **Year** | **Electricity Consumption (KWh per Capita)** |
| --- | --- |
| **1980-1984** | **68.663** |
| **1985-1989** | **88.604** |
| **1990-1994** | **92.238** |
| **1995-1999** | **82.052** |
| **2000-2004** | **95.569** |
| **2005-2009** | **124.881** |
| **2010-2016** | **143.807** |

**Source:** Author’s Computation from World Development Indicators (WDI, 2016)

**Table 2.2 Trend of Manufacturing Output in Nigeria from 1980 – 2016**

| **Year** | **Manufacturing Output (%GDP)** |
| --- | --- |
| **1980-1984** | **9.821** |
| **1985-1989** | **7.953** |
| **1990-1994** | **5.891** |
| **1995-1999** | **5.091** |
| **2000-2004** | **3.552** |
| **2005-2009** | **2.562** |
| **2010-2016** | **8.107** |

**Source:** Author’s Computation from World Development Indicators (WDI, 2016)

**Table 2.3 Trend of Electricity Consumption and Manufacturing Output in Nigeria from 1980 – 2016**

| **Year** | **Electricity Consumptions (%)** | **Manufacturing Output (%)** |
| --- | --- | --- |
| **1980-1984** | **4.214** | **9.821** |
| **1985-1989** | **4.482** | **7.953** |
| **1990-1994** | **4.523** | **5.891** |
| **1995-1999** | **4.405** | **5.091** |
| **2000-2004** | **4.541** | **3.552** |
| **2005-2009** | **4.825** | **2.562** |
| **2010-2016** | **4.967** | **8.107** |

**Source:** Author’s Computation from World Development Indicators (WDI, 2016)

| Null Hypothesis: MANOUT has a unit root | | | |  |
| --- | --- | --- | --- | --- |
| Exogenous: Constant | | |  |  |
| Lag Length: 0 (Automatic - based on SIC, maxlag=9) | | | | |
|  |  |  |  |  |
|  |  |  |  |  |
|  |  |  | t-Statistic | Prob.* |
|  |  |  |  |  |
|  |  |  |  |  |
| Augmented Dickey-Fuller test statistic | | | -0.035904 | 0.9493 |
| Test critical values: | 1% level |  | -3.610453 |  |
|  | 5% level |  | -2.938987 |  |
|  | 10% level |  | -2.607932 |  |
|  |  |  |  |  |
|  |  |  |  |  |
| *MacKinnon (1996) one-sided p-values. | | | |  |
|  |  |  |  |  |
|  |  |  |  |  |
| Augmented Dickey-Fuller Test Equation | | | |  |
| Dependent Variable: D(MANOUT) | | |  |  |
| Method: Least Squares | | |  |  |
| Date: 04/27/21 Time: 16:52 | | |  |  |
| Sample (adjusted): 1981 2019 | | |  |  |
| Included observations: 39 after adjustments | | | |  |
|  |  |  |  |  |
|  |  |  |  |  |
| Variable | Coefficient | Std. Error | t-Statistic | Prob. |
|  |  |  |  |  |
|  |  |  |  |  |
| MANOUT(-1) | -0.003473 | 0.096726 | -0.035904 | 0.9716 |
| C | 0.391179 | 0.828644 | 0.472071 | 0.6396 |
|  |  |  |  |  |
|  |  |  |  |  |
| R-squared | 0.000035 | Mean dependent var | | 0.366273 |
| Adjusted R-squared | -0.026991 | S.D. dependent var | | 2.793369 |
| S.E. of regression | 2.830817 | Akaike info criterion | | 4.968928 |
| Sum squared resid | 296.5003 | Schwarz criterion | | 5.054239 |
| Log likelihood | -94.89409 | Hannan-Quinn criter. | | 4.999537 |
| F-statistic | 0.001289 | Durbin-Watson stat | | 2.020022 |
| Prob(F-statistic) | 0.971552 |  |  |  |
|  |  |  |  |  |
|  |  |  |  |  |

| Null Hypothesis: D(MANOUT) has a unit root | | | |  |
| --- | --- | --- | --- | --- |
| Exogenous: Constant | | |  |  |
| Lag Length: 0 (Automatic - based on SIC, maxlag=9) | | | | |
|  |  |  |  |  |
|  |  |  |  |  |
|  |  |  | t-Statistic | Prob.* |
|  |  |  |  |  |
|  |  |  |  |  |
| Augmented Dickey-Fuller test statistic | | | -6.097627 | 0.0000 |
| Test critical values: | 1% level |  | -3.615588 |  |
|  | 5% level |  | -2.941145 |  |
|  | 10% level |  | -2.609066 |  |
|  |  |  |  |  |
|  |  |  |  |  |
| *MacKinnon (1996) one-sided p-values. | | | |  |
|  |  |  |  |  |
|  |  |  |  |  |
| Augmented Dickey-Fuller Test Equation | | | |  |
| Dependent Variable: D(MANOUT,2) | | | |  |
| Method: Least Squares | | |  |  |
| Date: 04/27/21 Time: 16:52 | | |  |  |
| Sample (adjusted): 1982 2019 | | |  |  |
| Included observations: 38 after adjustments | | | |  |
|  |  |  |  |  |
|  |  |  |  |  |
| Variable | Coefficient | Std. Error | t-Statistic | Prob. |
|  |  |  |  |  |
|  |  |  |  |  |
| D(MANOUT(-1)) | -1.014807 | 0.166427 | -6.097627 | 0.0000 |
| C | 0.394861 | 0.468906 | 0.842090 | 0.4053 |
|  |  |  |  |  |
|  |  |  |  |  |
| R-squared | 0.508069 | Mean dependent var | | 0.021344 |
| Adjusted R-squared | 0.494405 | S.D. dependent var | | 4.030304 |
| S.E. of regression | 2.865757 | Akaike info criterion | | 4.994738 |
| Sum squared resid | 295.6523 | Schwarz criterion | | 5.080927 |
| Log likelihood | -92.90002 | Hannan-Quinn criter. | | 5.025403 |
| F-statistic | 37.18106 | Durbin-Watson stat | | 2.002759 |
| Prob(F-statistic) | 0.000001 |  |  |  |
|  |  |  |  |  |
|  |  |  |  |  |

| Null Hypothesis: ELECTCON has a unit root | | | |  |
| --- | --- | --- | --- | --- |
| Exogenous: Constant | | |  |  |
| Lag Length: 0 (Automatic - based on SIC, maxlag=9) | | | | |
|  |  |  |  |  |
|  |  |  |  |  |
|  |  |  | t-Statistic | Prob.* |
|  |  |  |  |  |
|  |  |  |  |  |
| Augmented Dickey-Fuller test statistic | | | -1.696902 | 0.4249 |
| Test critical values: | 1% level |  | -3.610453 |  |
|  | 5% level |  | -2.938987 |  |
|  | 10% level |  | -2.607932 |  |
|  |  |  |  |  |
|  |  |  |  |  |
| *MacKinnon (1996) one-sided p-values. | | | |  |
|  |  |  |  |  |
|  |  |  |  |  |
| Augmented Dickey-Fuller Test Equation | | | |  |
| Dependent Variable: D(ELECTCON) | | | |  |
| Method: Least Squares | | |  |  |
| Date: 04/27/21 Time: 16:53 | | |  |  |
| Sample (adjusted): 1981 2019 | | |  |  |
| Included observations: 39 after adjustments | | | |  |
|  |  |  |  |  |
|  |  |  |  |  |
| Variable | Coefficient | Std. Error | t-Statistic | Prob. |
|  |  |  |  |  |
|  |  |  |  |  |
| ELECTCON(-1) | -0.137466 | 0.081010 | -1.696902 | 0.0981 |
| C | 0.652338 | 0.373826 | 1.745030 | 0.0893 |
|  |  |  |  |  |
|  |  |  |  |  |
| R-squared | 0.072204 | Mean dependent var | | 0.019126 |
| Adjusted R-squared | 0.047129 | S.D. dependent var | | 0.142968 |
| S.E. of regression | 0.139559 | Akaike info criterion | | -1.050744 |
| Sum squared resid | 0.720635 | Schwarz criterion | | -0.965433 |
| Log likelihood | 22.48950 | Hannan-Quinn criter. | | -1.020135 |
| F-statistic | 2.879477 | Durbin-Watson stat | | 2.375235 |
| Prob(F-statistic) | 0.098114 |  |  |  |
|  |  |  |  |  |
|  |  |  |  |  |

| Null Hypothesis: D(ELECTCON) has a unit root | | | |  |
| --- | --- | --- | --- | --- |
| Exogenous: Constant | | |  |  |
| Lag Length: 0 (Automatic - based on SIC, maxlag=9) | | | | |
|  |  |  |  |  |
|  |  |  |  |  |
|  |  |  | t-Statistic | Prob.* |
|  |  |  |  |  |
|  |  |  |  |  |
| Augmented Dickey-Fuller test statistic | | | -9.202765 | 0.0000 |
| Test critical values: | 1% level |  | -3.615588 |  |
|  | 5% level |  | -2.941145 |  |
|  | 10% level |  | -2.609066 |  |
|  |  |  |  |  |
|  |  |  |  |  |
| *MacKinnon (1996) one-sided p-values. | | | |  |
|  |  |  |  |  |
|  |  |  |  |  |
| Augmented Dickey-Fuller Test Equation | | | |  |
| Dependent Variable: D(ELECTCON,2) | | | |  |
| Method: Least Squares | | |  |  |
| Date: 04/27/21 Time: 16:53 | | |  |  |
| Sample (adjusted): 1982 2019 | | |  |  |
| Included observations: 38 after adjustments | | | |  |
|  |  |  |  |  |
|  |  |  |  |  |
| Variable | Coefficient | Std. Error | t-Statistic | Prob. |
|  |  |  |  |  |
|  |  |  |  |  |
| D(ELECTCON(-1)) | -1.337024 | 0.145285 | -9.202765 | 0.0000 |
| C | 0.033834 | 0.020960 | 1.614175 | 0.1152 |
|  |  |  |  |  |
|  |  |  |  |  |
| R-squared | 0.701717 | Mean dependent var | | 0.007815 |
| Adjusted R-squared | 0.693432 | S.D. dependent var | | 0.231229 |
| S.E. of regression | 0.128028 | Akaike info criterion | | -1.221935 |
| Sum squared resid | 0.590085 | Schwarz criterion | | -1.135746 |
| Log likelihood | 25.21676 | Hannan-Quinn criter. | | -1.191269 |
| F-statistic | 84.69088 | Durbin-Watson stat | | 1.709987 |
| Prob(F-statistic) | 0.000000 |  |  |  |
|  |  |  |  |  |
|  |  |  |  |  |

| Null Hypothesis: INF has a unit root | | | |  |
| --- | --- | --- | --- | --- |
| Exogenous: Constant | | |  |  |
| Lag Length: 0 (Automatic - based on SIC, maxlag=9) | | | | |
|  |  |  |  |  |
|  |  |  |  |  |
|  |  |  | t-Statistic | Prob.* |
|  |  |  |  |  |
|  |  |  |  |  |
| Augmented Dickey-Fuller test statistic | | | -2.979729 | 0.0457 |
| Test critical values: | 1% level |  | -3.610453 |  |
|  | 5% level |  | -2.938987 |  |
|  | 10% level |  | -2.607932 |  |
|  |  |  |  |  |
|  |  |  |  |  |
| *MacKinnon (1996) one-sided p-values. | | | |  |
|  |  |  |  |  |
|  |  |  |  |  |
| Augmented Dickey-Fuller Test Equation | | | |  |
| Dependent Variable: D(INF) | | |  |  |
| Method: Least Squares | | |  |  |
| Date: 04/27/21 Time: 16:54 | | |  |  |
| Sample (adjusted): 1981 2019 | | |  |  |
| Included observations: 39 after adjustments | | | |  |
|  |  |  |  |  |
|  |  |  |  |  |
| Variable | Coefficient | Std. Error | t-Statistic | Prob. |
|  |  |  |  |  |
|  |  |  |  |  |
| INF(-1) | -0.386282 | 0.129637 | -2.979729 | 0.0051 |
| C | 7.334141 | 3.288647 | 2.230139 | 0.0319 |
|  |  |  |  |  |
|  |  |  |  |  |
| R-squared | 0.193527 | Mean dependent var | | 0.026021 |
| Adjusted R-squared | 0.171730 | S.D. dependent var | | 15.03357 |
| S.E. of regression | 13.68195 | Akaike info criterion | | 8.119952 |
| Sum squared resid | 6926.243 | Schwarz criterion | | 8.205263 |
| Log likelihood | -156.3391 | Hannan-Quinn criter. | | 8.150561 |
| F-statistic | 8.878782 | Durbin-Watson stat | | 1.642727 |
| Prob(F-statistic) | 0.005073 |  |  |  |
|  |  |  |  |  |
|  |  |  |  |  |

| Null Hypothesis: D(INF) has a unit root | | | |  |
| --- | --- | --- | --- | --- |
| Exogenous: Constant | | |  |  |
| Lag Length: 0 (Automatic - based on SIC, maxlag=9) | | | | |
|  |  |  |  |  |
|  |  |  |  |  |
|  |  |  | t-Statistic | Prob.* |
|  |  |  |  |  |
|  |  |  |  |  |
| Augmented Dickey-Fuller test statistic | | | -5.857288 | 0.0000 |
| Test critical values: | 1% level |  | -3.615588 |  |
|  | 5% level |  | -2.941145 |  |
|  | 10% level |  | -2.609066 |  |
|  |  |  |  |  |
|  |  |  |  |  |
| *MacKinnon (1996) one-sided p-values. | | | |  |
|  |  |  |  |  |
|  |  |  |  |  |
| Augmented Dickey-Fuller Test Equation | | | |  |
| Dependent Variable: D(INF,2) | | |  |  |
| Method: Least Squares | | |  |  |
| Date: 04/27/21 Time: 16:54 | | |  |  |
| Sample (adjusted): 1982 2019 | | |  |  |
| Included observations: 38 after adjustments | | | |  |
|  |  |  |  |  |
|  |  |  |  |  |
| Variable | Coefficient | Std. Error | t-Statistic | Prob. |
|  |  |  |  |  |
|  |  |  |  |  |
| D(INF(-1)) | -0.968902 | 0.165418 | -5.857288 | 0.0000 |
| C | -0.259060 | 2.486805 | -0.104174 | 0.9176 |
|  |  |  |  |  |
|  |  |  |  |  |
| R-squared | 0.487966 | Mean dependent var | | -0.274264 |
| Adjusted R-squared | 0.473743 | S.D. dependent var | | 21.13169 |
| S.E. of regression | 15.32969 | Akaike info criterion | | 8.348656 |
| Sum squared resid | 8459.976 | Schwarz criterion | | 8.434844 |
| Log likelihood | -156.6245 | Hannan-Quinn criter. | | 8.379321 |
| F-statistic | 34.30783 | Durbin-Watson stat | | 1.919386 |
| Prob(F-statistic) | 0.000001 |  |  |  |
|  |  |  |  |  |
|  |  |  |  |  |

| Null Hypothesis: INT has a unit root | | | |  |
| --- | --- | --- | --- | --- |
| Exogenous: Constant | | |  |  |
| Lag Length: 0 (Automatic - based on SIC, maxlag=9) | | | | |
|  |  |  |  |  |
|  |  |  |  |  |
|  |  |  | t-Statistic | Prob.* |
|  |  |  |  |  |
|  |  |  |  |  |
| Augmented Dickey-Fuller test statistic | | | -2.425758 | 0.1415 |
| Test critical values: | 1% level |  | -3.610453 |  |
|  | 5% level |  | -2.938987 |  |
|  | 10% level |  | -2.607932 |  |
|  |  |  |  |  |
|  |  |  |  |  |
| *MacKinnon (1996) one-sided p-values. | | | |  |
|  |  |  |  |  |
|  |  |  |  |  |
| Augmented Dickey-Fuller Test Equation | | | |  |
| Dependent Variable: D(INT) | | |  |  |
| Method: Least Squares | | |  |  |
| Date: 04/27/21 Time: 16:55 | | |  |  |
| Sample (adjusted): 1981 2019 | | |  |  |
| Included observations: 39 after adjustments | | | |  |
|  |  |  |  |  |
|  |  |  |  |  |
| Variable | Coefficient | Std. Error | t-Statistic | Prob. |
|  |  |  |  |  |
|  |  |  |  |  |
| INT(-1) | -0.220065 | 0.090720 | -2.425758 | 0.0203 |
| C | 4.057239 | 1.647521 | 2.462633 | 0.0186 |
|  |  |  |  |  |
|  |  |  |  |  |
| R-squared | 0.137213 | Mean dependent var | | 0.211309 |
| Adjusted R-squared | 0.113895 | S.D. dependent var | | 2.971791 |
| S.E. of regression | 2.797441 | Akaike info criterion | | 4.945207 |
| Sum squared resid | 289.5500 | Schwarz criterion | | 5.030518 |
| Log likelihood | -94.43154 | Hannan-Quinn criter. | | 4.975816 |
| F-statistic | 5.884304 | Durbin-Watson stat | | 2.116528 |
| Prob(F-statistic) | 0.020271 |  |  |  |
|  |  |  |  |  |
|  |  |  |  |  |

| Null Hypothesis: D(INT) has a unit root | | | |  |
| --- | --- | --- | --- | --- |
| Exogenous: Constant | | |  |  |
| Lag Length: 1 (Automatic - based on SIC, maxlag=9) | | | | |
|  |  |  |  |  |
|  |  |  |  |  |
|  |  |  | t-Statistic | Prob.* |
|  |  |  |  |  |
|  |  |  |  |  |
| Augmented Dickey-Fuller test statistic | | | -5.454307 | 0.0001 |
| Test critical values: | 1% level |  | -3.621023 |  |
|  | 5% level |  | -2.943427 |  |
|  | 10% level |  | -2.610263 |  |
|  |  |  |  |  |
|  |  |  |  |  |
| *MacKinnon (1996) one-sided p-values. | | | |  |
|  |  |  |  |  |
|  |  |  |  |  |
| Augmented Dickey-Fuller Test Equation | | | |  |
| Dependent Variable: D(INT,2) | | |  |  |
| Method: Least Squares | | |  |  |
| Date: 04/27/21 Time: 16:56 | | |  |  |
| Sample (adjusted): 1983 2019 | | |  |  |
| Included observations: 37 after adjustments | | | |  |
|  |  |  |  |  |
|  |  |  |  |  |
| Variable | Coefficient | Std. Error | t-Statistic | Prob. |
|  |  |  |  |  |
|  |  |  |  |  |
| D(INT(-1)) | -1.380344 | 0.253074 | -5.454307 | 0.0000 |
| D(INT(-1),2) | 0.210709 | 0.167604 | 1.257185 | 0.2173 |
| C | 0.275525 | 0.502724 | 0.548065 | 0.5872 |
|  |  |  |  |  |
|  |  |  |  |  |
| R-squared | 0.589264 | Mean dependent var | | -0.017004 |
| Adjusted R-squared | 0.565103 | S.D. dependent var | | 4.609318 |
| S.E. of regression | 3.039693 | Akaike info criterion | | 5.138995 |
| Sum squared resid | 314.1509 | Schwarz criterion | | 5.269610 |
| Log likelihood | -92.07140 | Hannan-Quinn criter. | | 5.185043 |
| F-statistic | 24.38915 | Durbin-Watson stat | | 1.848735 |
| Prob(F-statistic) | 0.000000 |  |  |  |
|  |  |  |  |  |
|  |  |  |  |  |

| Null Hypothesis: LAB has a unit root | | | |  |
| --- | --- | --- | --- | --- |
| Exogenous: Constant | | |  |  |
| Lag Length: 0 (Automatic - based on SIC, maxlag=9) | | | | |
|  |  |  |  |  |
|  |  |  |  |  |
|  |  |  | t-Statistic | Prob.* |
|  |  |  |  |  |
|  |  |  |  |  |
| Augmented Dickey-Fuller test statistic | | | -5.733222 | 0.0000 |
| Test critical values: | 1% level |  | -3.610453 |  |
|  | 5% level |  | -2.938987 |  |
|  | 10% level |  | -2.607932 |  |
|  |  |  |  |  |
|  |  |  |  |  |
| *MacKinnon (1996) one-sided p-values. | | | |  |
|  |  |  |  |  |
|  |  |  |  |  |
| Augmented Dickey-Fuller Test Equation | | | |  |
| Dependent Variable: D(LAB) | | |  |  |
| Method: Least Squares | | |  |  |
| Date: 04/27/21 Time: 16:56 | | |  |  |
| Sample (adjusted): 1981 2019 | | |  |  |
| Included observations: 39 after adjustments | | | |  |
|  |  |  |  |  |
|  |  |  |  |  |
| Variable | Coefficient | Std. Error | t-Statistic | Prob. |
|  |  |  |  |  |
|  |  |  |  |  |
| LAB(-1) | -0.940189 | 0.163990 | -5.733222 | 0.0000 |
| C | 16.35124 | 2.851223 | 5.734816 | 0.0000 |
|  |  |  |  |  |
|  |  |  |  |  |
| R-squared | 0.470444 | Mean dependent var | | 0.008140 |
| Adjusted R-squared | 0.456132 | S.D. dependent var | | 0.506320 |
| S.E. of regression | 0.373398 | Akaike info criterion | | 0.917578 |
| Sum squared resid | 5.158771 | Schwarz criterion | | 1.002889 |
| Log likelihood | -15.89277 | Hannan-Quinn criter. | | 0.948187 |
| F-statistic | 32.86983 | Durbin-Watson stat | | 2.006441 |
| Prob(F-statistic) | 0.000001 |  |  |  |
|  |  |  |  |  |
|  |  |  |  |  |

| Null Hypothesis: D(LAB) has a unit root | | | |  |
| --- | --- | --- | --- | --- |
| Exogenous: Constant | | |  |  |
| Lag Length: 1 (Automatic - based on SIC, maxlag=9) | | | | |
|  |  |  |  |  |
|  |  |  |  |  |
|  |  |  | t-Statistic | Prob.* |
|  |  |  |  |  |
|  |  |  |  |  |
| Augmented Dickey-Fuller test statistic | | | -7.285938 | 0.0000 |
| Test critical values: | 1% level |  | -3.621023 |  |
|  | 5% level |  | -2.943427 |  |
|  | 10% level |  | -2.610263 |  |
|  |  |  |  |  |
|  |  |  |  |  |
| *MacKinnon (1996) one-sided p-values. | | | |  |
|  |  |  |  |  |
|  |  |  |  |  |
| Augmented Dickey-Fuller Test Equation | | | |  |
| Dependent Variable: D(LAB,2) | | |  |  |
| Method: Least Squares | | |  |  |
| Date: 04/27/21 Time: 16:57 | | |  |  |
| Sample (adjusted): 1983 2019 | | |  |  |
| Included observations: 37 after adjustments | | | |  |
|  |  |  |  |  |
|  |  |  |  |  |
| Variable | Coefficient | Std. Error | t-Statistic | Prob. |
|  |  |  |  |  |
|  |  |  |  |  |
| D(LAB(-1)) | -2.692262 | 0.369515 | -7.285938 | 0.0000 |
| D(LAB(-1),2) | 0.810403 | 0.233902 | 3.464713 | 0.0015 |
| C | -0.022971 | 0.066654 | -0.344638 | 0.7325 |
|  |  |  |  |  |
|  |  |  |  |  |
| R-squared | 0.812151 | Mean dependent var | | -0.001067 |
| Adjusted R-squared | 0.801101 | S.D. dependent var | | 0.898433 |
| S.E. of regression | 0.400684 | Akaike info criterion | | 1.086316 |
| Sum squared resid | 5.458612 | Schwarz criterion | | 1.216931 |
| Log likelihood | -17.09684 | Hannan-Quinn criter. | | 1.132364 |
| F-statistic | 73.49839 | Durbin-Watson stat | | 2.005434 |
| Prob(F-statistic) | 0.000000 |  |  |  |
|  |  |  |  |  |
|  |  |  |  |  |

| Null Hypothesis: GFCF has a unit root | | | |  |
| --- | --- | --- | --- | --- |
| Exogenous: Constant | | |  |  |
| Lag Length: 3 (Automatic - based on SIC, maxlag=9) | | | | |
|  |  |  |  |  |
|  |  |  |  |  |
|  |  |  | t-Statistic | Prob.* |
|  |  |  |  |  |
|  |  |  |  |  |
| Augmented Dickey-Fuller test statistic | | | -0.014604 | 0.9510 |
| Test critical values: | 1% level |  | -3.626784 |  |
|  | 5% level |  | -2.945842 |  |
|  | 10% level |  | -2.611531 |  |
|  |  |  |  |  |
|  |  |  |  |  |
| *MacKinnon (1996) one-sided p-values. | | | |  |
|  |  |  |  |  |
|  |  |  |  |  |
| Augmented Dickey-Fuller Test Equation | | | |  |
| Dependent Variable: D(GFCF) | | |  |  |
| Method: Least Squares | | |  |  |
| Date: 04/27/21 Time: 16:57 | | |  |  |
| Sample (adjusted): 1984 2019 | | |  |  |
| Included observations: 36 after adjustments | | | |  |
|  |  |  |  |  |
|  |  |  |  |  |
| Variable | Coefficient | Std. Error | t-Statistic | Prob. |
|  |  |  |  |  |
|  |  |  |  |  |
| GFCF(-1) | -0.000951 | 0.065101 | -0.014604 | 0.9884 |
| D(GFCF(-1)) | 0.199090 | 0.187666 | 1.060869 | 0.2969 |
| D(GFCF(-2)) | -0.274477 | 0.165634 | -1.657130 | 0.1076 |
| D(GFCF(-3)) | -0.053821 | 0.113558 | -0.473957 | 0.6389 |
| C | 0.053774 | 1.559037 | 0.034492 | 0.9727 |
|  |  |  |  |  |
|  |  |  |  |  |
| R-squared | 0.124201 | Mean dependent var | | 0.030003 |
| Adjusted R-squared | 0.011194 | S.D. dependent var | | 0.224246 |
| S.E. of regression | 0.222987 | Akaike info criterion | | -0.035157 |
| Sum squared resid | 1.541425 | Schwarz criterion | | 0.184777 |
| Log likelihood | 5.632819 | Hannan-Quinn criter. | | 0.041606 |
| F-statistic | 1.099059 | Durbin-Watson stat | | 1.735640 |
| Prob(F-statistic) | 0.374467 |  |  |  |
|  |  |  |  |  |
|  |  |  |  |  |

| Null Hypothesis: D(GFCF) has a unit root | | | |  |
| --- | --- | --- | --- | --- |
| Exogenous: Constant | | |  |  |
| Lag Length: 2 (Automatic - based on SIC, maxlag=9) | | | | |
|  |  |  |  |  |
|  |  |  |  |  |
|  |  |  | t-Statistic | Prob.* |
|  |  |  |  |  |
|  |  |  |  |  |
| Augmented Dickey-Fuller test statistic | | | -4.379828 | 0.0014 |
| Test critical values: | 1% level |  | -3.626784 |  |
|  | 5% level |  | -2.945842 |  |
|  | 10% level |  | -2.611531 |  |
|  |  |  |  |  |
|  |  |  |  |  |
| *MacKinnon (1996) one-sided p-values. | | | |  |
|  |  |  |  |  |
|  |  |  |  |  |
| Augmented Dickey-Fuller Test Equation | | | |  |
| Dependent Variable: D(GFCF,2) | | |  |  |
| Method: Least Squares | | |  |  |
| Date: 04/27/21 Time: 16:58 | | |  |  |
| Sample (adjusted): 1984 2019 | | |  |  |
| Included observations: 36 after adjustments | | | |  |
|  |  |  |  |  |
|  |  |  |  |  |
| Variable | Coefficient | Std. Error | t-Statistic | Prob. |
|  |  |  |  |  |
|  |  |  |  |  |
| D(GFCF(-1)) | -1.131103 | 0.258253 | -4.379828 | 0.0001 |
| D(GFCF(-1),2) | 0.329355 | 0.185011 | 1.780189 | 0.0845 |
| D(GFCF(-2),2) | 0.054285 | 0.107308 | 0.505885 | 0.6164 |
| C | 0.031012 | 0.037288 | 0.831704 | 0.4117 |
|  |  |  |  |  |
|  |  |  |  |  |
| R-squared | 0.495696 | Mean dependent var | | 0.013992 |
| Adjusted R-squared | 0.448417 | S.D. dependent var | | 0.295517 |
| S.E. of regression | 0.219476 | Akaike info criterion | | -0.090705 |
| Sum squared resid | 1.541436 | Schwarz criterion | | 0.085241 |
| Log likelihood | 5.632695 | Hannan-Quinn criter. | | -0.029295 |
| F-statistic | 10.48459 | Durbin-Watson stat | | 1.735522 |
| Prob(F-statistic) | 0.000059 |  |  |  |
|  |  |  |  |  |
|  |  |  |  |  |

| Null Hypothesis: EXCH has a unit root | | | |  |
| --- | --- | --- | --- | --- |
| Exogenous: Constant | | |  |  |
| Lag Length: 0 (Automatic - based on SIC, maxlag=9) | | | | |
|  |  |  |  |  |
|  |  |  |  |  |
|  |  |  | t-Statistic | Prob.* |
|  |  |  |  |  |
|  |  |  |  |  |
| Augmented Dickey-Fuller test statistic | | | 1.472376 | 0.9989 |
| Test critical values: | 1% level |  | -3.610453 |  |
|  | 5% level |  | -2.938987 |  |
|  | 10% level |  | -2.607932 |  |
|  |  |  |  |  |
|  |  |  |  |  |
| *MacKinnon (1996) one-sided p-values. | | | |  |
|  |  |  |  |  |
|  |  |  |  |  |
| Augmented Dickey-Fuller Test Equation | | | |  |
| Dependent Variable: D(EXCH) | | |  |  |
| Method: Least Squares | | |  |  |
| Date: 04/27/21 Time: 16:59 | | |  |  |
| Sample (adjusted): 1981 2019 | | |  |  |
| Included observations: 39 after adjustments | | | |  |
|  |  |  |  |  |
|  |  |  |  |  |
| Variable | Coefficient | Std. Error | t-Statistic | Prob. |
|  |  |  |  |  |
|  |  |  |  |  |
| EXCH(-1) | 0.047262 | 0.032099 | 1.472376 | 0.1494 |
| C | 3.777079 | 3.910669 | 0.965840 | 0.3404 |
|  |  |  |  |  |
|  |  |  |  |  |
| R-squared | 0.055349 | Mean dependent var | | 7.855211 |
| Adjusted R-squared | 0.029818 | S.D. dependent var | | 17.50383 |
| S.E. of regression | 17.24089 | Akaike info criterion | | 8.582366 |
| Sum squared resid | 10998.19 | Schwarz criterion | | 8.667677 |
| Log likelihood | -165.3561 | Hannan-Quinn criter. | | 8.612975 |
| F-statistic | 2.167892 | Durbin-Watson stat | | 1.498775 |
| Prob(F-statistic) | 0.149375 |  |  |  |
|  |  |  |  |  |
|  |  |  |  |  |

| Null Hypothesis: D(EXCH) has a unit root | | | |  |
| --- | --- | --- | --- | --- |
| Exogenous: Constant | | |  |  |
| Lag Length: 0 (Automatic - based on SIC, maxlag=9) | | | | |
|  |  |  |  |  |
|  |  |  |  |  |
|  |  |  | t-Statistic | Prob.* |
|  |  |  |  |  |
|  |  |  |  |  |
| Augmented Dickey-Fuller test statistic | | | -4.299767 | 0.0016 |
| Test critical values: | 1% level |  | -3.615588 |  |
|  | 5% level |  | -2.941145 |  |
|  | 10% level |  | -2.609066 |  |
|  |  |  |  |  |
|  |  |  |  |  |
| *MacKinnon (1996) one-sided p-values. | | | |  |
|  |  |  |  |  |
|  |  |  |  |  |
| Augmented Dickey-Fuller Test Equation | | | |  |
| Dependent Variable: D(EXCH,2) | | |  |  |
| Method: Least Squares | | |  |  |
| Date: 04/27/21 Time: 16:59 | | |  |  |
| Sample (adjusted): 1982 2019 | | |  |  |
| Included observations: 38 after adjustments | | | |  |
|  |  |  |  |  |
|  |  |  |  |  |
| Variable | Coefficient | Std. Error | t-Statistic | Prob. |
|  |  |  |  |  |
|  |  |  |  |  |
| D(EXCH(-1)) | -0.678129 | 0.157713 | -4.299767 | 0.0001 |
| C | 5.471934 | 3.032419 | 1.804478 | 0.0795 |
|  |  |  |  |  |
|  |  |  |  |  |
| R-squared | 0.339304 | Mean dependent var | | 0.019186 |
| Adjusted R-squared | 0.320951 | S.D. dependent var | | 20.60567 |
| S.E. of regression | 16.97998 | Akaike info criterion | | 8.553143 |
| Sum squared resid | 10379.51 | Schwarz criterion | | 8.639332 |
| Log likelihood | -160.5097 | Hannan-Quinn criter. | | 8.583809 |
| F-statistic | 18.48800 | Durbin-Watson stat | | 1.948425 |
| Prob(F-statistic) | 0.000125 |  |  |  |
|  |  |  |  |  |
|  |  |  |  |  |

| Null Hypothesis: ELECTP has a unit root | | | |  |
| --- | --- | --- | --- | --- |
| Exogenous: Constant | | |  |  |
| Lag Length: 0 (Automatic - based on SIC, maxlag=9) | | | | |
|  |  |  |  |  |
|  |  |  |  |  |
|  |  |  | t-Statistic | Prob.* |
|  |  |  |  |  |
|  |  |  |  |  |
| Augmented Dickey-Fuller test statistic | | | -1.420259 | 0.5626 |
| Test critical values: | 1% level |  | -3.610453 |  |
|  | 5% level |  | -2.938987 |  |
|  | 10% level |  | -2.607932 |  |
|  |  |  |  |  |
|  |  |  |  |  |
| *MacKinnon (1996) one-sided p-values. | | | |  |
|  |  |  |  |  |
|  |  |  |  |  |
| Augmented Dickey-Fuller Test Equation | | | |  |
| Dependent Variable: D(ELECTP) | | |  |  |
| Method: Least Squares | | |  |  |
| Date: 04/27/21 Time: 17:00 | | |  |  |
| Sample (adjusted): 1981 2019 | | |  |  |
| Included observations: 39 after adjustments | | | |  |
|  |  |  |  |  |
|  |  |  |  |  |
| Variable | Coefficient | Std. Error | t-Statistic | Prob. |
|  |  |  |  |  |
|  |  |  |  |  |
| ELECTP(-1) | -0.108199 | 0.076182 | -1.420259 | 0.1639 |
| C | 2.837876 | 2.382981 | 1.190894 | 0.2413 |
|  |  |  |  |  |
|  |  |  |  |  |
| R-squared | 0.051699 | Mean dependent var | | -0.463939 |
| Adjusted R-squared | 0.026069 | S.D. dependent var | | 3.311854 |
| S.E. of regression | 3.268401 | Akaike info criterion | | 5.256399 |
| Sum squared resid | 395.2504 | Schwarz criterion | | 5.341710 |
| Log likelihood | -100.4998 | Hannan-Quinn criter. | | 5.287008 |
| F-statistic | 2.017135 | Durbin-Watson stat | | 2.006262 |
| Prob(F-statistic) | 0.163905 |  |  |  |
|  |  |  |  |  |
|  |  |  |  |  |

| Null Hypothesis: D(ELECTP) has a unit root | | | |  |
| --- | --- | --- | --- | --- |
| Exogenous: Constant | | |  |  |
| Lag Length: 0 (Automatic - based on SIC, maxlag=9) | | | | |
|  |  |  |  |  |
|  |  |  |  |  |
|  |  |  | t-Statistic | Prob.* |
|  |  |  |  |  |
|  |  |  |  |  |
| Augmented Dickey-Fuller test statistic | | | -7.466613 | 0.0000 |
| Test critical values: | 1% level |  | -3.615588 |  |
|  | 5% level |  | -2.941145 |  |
|  | 10% level |  | -2.609066 |  |
|  |  |  |  |  |
|  |  |  |  |  |
| *MacKinnon (1996) one-sided p-values. | | | |  |
|  |  |  |  |  |
|  |  |  |  |  |
| Augmented Dickey-Fuller Test Equation | | | |  |
| Dependent Variable: D(ELECTP,2) | | | |  |
| Method: Least Squares | | |  |  |
| Date: 04/27/21 Time: 17:00 | | |  |  |
| Sample (adjusted): 1982 2019 | | |  |  |
| Included observations: 38 after adjustments | | | |  |
|  |  |  |  |  |
|  |  |  |  |  |
| Variable | Coefficient | Std. Error | t-Statistic | Prob. |
|  |  |  |  |  |
|  |  |  |  |  |
| D(ELECTP(-1)) | -1.139857 | 0.152661 | -7.466613 | 0.0000 |
| C | -0.331428 | 0.510564 | -0.649141 | 0.5204 |
|  |  |  |  |  |
|  |  |  |  |  |
| R-squared | 0.607631 | Mean dependent var | | 0.222991 |
| Adjusted R-squared | 0.596732 | S.D. dependent var | | 4.903463 |
| S.E. of regression | 3.113867 | Akaike info criterion | | 5.160804 |
| Sum squared resid | 349.0620 | Schwarz criterion | | 5.246992 |
| Log likelihood | -96.05527 | Hannan-Quinn criter. | | 5.191469 |
| F-statistic | 55.75031 | Durbin-Watson stat | | 2.046916 |
| Prob(F-statistic) | 0.000000 |  |  |  |
|  |  |  |  |  |
|  |  |  |  |  |

| Null Hypothesis: MANOUT has a unit root | | | |  |
| --- | --- | --- | --- | --- |
| Exogenous: Constant | | |  |  |
| Bandwidth: 1 (Newey-West automatic) using Bartlett kernel | | | | |
|  |  |  |  |  |
|  |  |  |  |  |
|  |  |  | Adj. t-Stat | Prob.* |
|  |  |  |  |  |
|  |  |  |  |  |
| Phillips-Perron test statistic | | | -0.015265 | 0.9514 |
| Test critical values: | 1% level |  | -3.610453 |  |
|  | 5% level |  | -2.938987 |  |
|  | 10% level |  | -2.607932 |  |
|  |  |  |  |  |
|  |  |  |  |  |
| *MacKinnon (1996) one-sided p-values. | | | |  |
|  |  |  |  |  |
|  |  |  |  |  |
|  |  |  |  |  |
| Residual variance (no correction) | | | | 7.602573 |
| HAC corrected variance (Bartlett kernel) | | | | 7.516803 |
|  |  |  |  |  |
|  |  |  |  |  |
|  |  |  |  |  |
|  |  |  |  |  |
| Phillips-Perron Test Equation | | |  |  |
| Dependent Variable: D(MANOUT) | | |  |  |
| Method: Least Squares | | |  |  |
| Date: 04/27/21 Time: 17:01 | | |  |  |
| Sample (adjusted): 1981 2019 | | |  |  |
| Included observations: 39 after adjustments | | | |  |
|  |  |  |  |  |
|  |  |  |  |  |
| Variable | Coefficient | Std. Error | t-Statistic | Prob. |
|  |  |  |  |  |
|  |  |  |  |  |
| MANOUT(-1) | -0.003473 | 0.096726 | -0.035904 | 0.9716 |
| C | 0.391179 | 0.828644 | 0.472071 | 0.6396 |
|  |  |  |  |  |
|  |  |  |  |  |
| R-squared | 0.000035 | Mean dependent var | | 0.366273 |
| Adjusted R-squared | -0.026991 | S.D. dependent var | | 2.793369 |
| S.E. of regression | 2.830817 | Akaike info criterion | | 4.968928 |
| Sum squared resid | 296.5003 | Schwarz criterion | | 5.054239 |
| Log likelihood | -94.89409 | Hannan-Quinn criter. | | 4.999537 |
| F-statistic | 0.001289 | Durbin-Watson stat | | 2.020022 |
| Prob(F-statistic) | 0.971552 |  |  |  |
|  |  |  |  |  |
|  |  |  |  |  |

| Null Hypothesis: D(MANOUT) has a unit root | | | |  |
| --- | --- | --- | --- | --- |
| Exogenous: Constant | | |  |  |
| Bandwidth: 1 (Newey-West automatic) using Bartlett kernel | | | | |
|  |  |  |  |  |
|  |  |  |  |  |
|  |  |  | Adj. t-Stat | Prob.* |
|  |  |  |  |  |
|  |  |  |  |  |
| Phillips-Perron test statistic | | | -6.097588 | 0.0000 |
| Test critical values: | 1% level |  | -3.615588 |  |
|  | 5% level |  | -2.941145 |  |
|  | 10% level |  | -2.609066 |  |
|  |  |  |  |  |
|  |  |  |  |  |
| *MacKinnon (1996) one-sided p-values. | | | |  |
|  |  |  |  |  |
|  |  |  |  |  |
|  |  |  |  |  |
| Residual variance (no correction) | | | | 7.780323 |
| HAC corrected variance (Bartlett kernel) | | | | 7.769469 |
|  |  |  |  |  |
|  |  |  |  |  |
|  |  |  |  |  |
|  |  |  |  |  |
| Phillips-Perron Test Equation | | |  |  |
| Dependent Variable: D(MANOUT,2) | | | |  |
| Method: Least Squares | | |  |  |
| Date: 04/27/21 Time: 17:02 | | |  |  |
| Sample (adjusted): 1982 2019 | | |  |  |
| Included observations: 38 after adjustments | | | |  |
|  |  |  |  |  |
|  |  |  |  |  |
| Variable | Coefficient | Std. Error | t-Statistic | Prob. |
|  |  |  |  |  |
|  |  |  |  |  |
| D(MANOUT(-1)) | -1.014807 | 0.166427 | -6.097627 | 0.0000 |
| C | 0.394861 | 0.468906 | 0.842090 | 0.4053 |
|  |  |  |  |  |
|  |  |  |  |  |
| R-squared | 0.508069 | Mean dependent var | | 0.021344 |
| Adjusted R-squared | 0.494405 | S.D. dependent var | | 4.030304 |
| S.E. of regression | 2.865757 | Akaike info criterion | | 4.994738 |
| Sum squared resid | 295.6523 | Schwarz criterion | | 5.080927 |
| Log likelihood | -92.90002 | Hannan-Quinn criter. | | 5.025403 |
| F-statistic | 37.18106 | Durbin-Watson stat | | 2.002759 |
| Prob(F-statistic) | 0.000001 |  |  |  |
|  |  |  |  |  |
|  |  |  |  |  |

| Null Hypothesis: ELECTCON has a unit root | | | |  |
| --- | --- | --- | --- | --- |
| Exogenous: Constant | | |  |  |
| Bandwidth: 4 (Newey-West automatic) using Bartlett kernel | | | | |
|  |  |  |  |  |
|  |  |  |  |  |
|  |  |  | Adj. t-Stat | Prob.* |
|  |  |  |  |  |
|  |  |  |  |  |
| Phillips-Perron test statistic | | | -1.441165 | 0.5523 |
| Test critical values: | 1% level |  | -3.610453 |  |
|  | 5% level |  | -2.938987 |  |
|  | 10% level |  | -2.607932 |  |
|  |  |  |  |  |
|  |  |  |  |  |
| *MacKinnon (1996) one-sided p-values. | | | |  |
|  |  |  |  |  |
|  |  |  |  |  |
|  |  |  |  |  |
| Residual variance (no correction) | | | | 0.018478 |
| HAC corrected variance (Bartlett kernel) | | | | 0.012112 |
|  |  |  |  |  |
|  |  |  |  |  |
|  |  |  |  |  |
|  |  |  |  |  |
| Phillips-Perron Test Equation | | |  |  |
| Dependent Variable: D(ELECTCON) | | | |  |
| Method: Least Squares | | |  |  |
| Date: 04/27/21 Time: 17:03 | | |  |  |
| Sample (adjusted): 1981 2019 | | |  |  |
| Included observations: 39 after adjustments | | | |  |
|  |  |  |  |  |
|  |  |  |  |  |
| Variable | Coefficient | Std. Error | t-Statistic | Prob. |
|  |  |  |  |  |
|  |  |  |  |  |
| ELECTCON(-1) | -0.137466 | 0.081010 | -1.696902 | 0.0981 |
| C | 0.652338 | 0.373826 | 1.745030 | 0.0893 |
|  |  |  |  |  |
|  |  |  |  |  |
| R-squared | 0.072204 | Mean dependent var | | 0.019126 |
| Adjusted R-squared | 0.047129 | S.D. dependent var | | 0.142968 |
| S.E. of regression | 0.139559 | Akaike info criterion | | -1.050744 |
| Sum squared resid | 0.720635 | Schwarz criterion | | -0.965433 |
| Log likelihood | 22.48950 | Hannan-Quinn criter. | | -1.020135 |
| F-statistic | 2.879477 | Durbin-Watson stat | | 2.375235 |
| Prob(F-statistic) | 0.098114 |  |  |  |
|  |  |  |  |  |
|  |  |  |  |  |

| Null Hypothesis: D(ELECTCON) has a unit root | | | |  |
| --- | --- | --- | --- | --- |
| Exogenous: Constant | | |  |  |
| Bandwidth: 1 (Newey-West automatic) using Bartlett kernel | | | | |
|  |  |  |  |  |
|  |  |  |  |  |
|  |  |  | Adj. t-Stat | Prob.* |
|  |  |  |  |  |
|  |  |  |  |  |
| Phillips-Perron test statistic | | | -9.122489 | 0.0000 |
| Test critical values: | 1% level |  | -3.615588 |  |
|  | 5% level |  | -2.941145 |  |
|  | 10% level |  | -2.609066 |  |
|  |  |  |  |  |
|  |  |  |  |  |
| *MacKinnon (1996) one-sided p-values. | | | |  |
|  |  |  |  |  |
|  |  |  |  |  |
|  |  |  |  |  |
| Residual variance (no correction) | | | | 0.015529 |
| HAC corrected variance (Bartlett kernel) | | | | 0.016211 |
|  |  |  |  |  |
|  |  |  |  |  |
|  |  |  |  |  |
|  |  |  |  |  |
| Phillips-Perron Test Equation | | |  |  |
| Dependent Variable: D(ELECTCON,2) | | | |  |
| Method: Least Squares | | |  |  |
| Date: 04/27/21 Time: 17:04 | | |  |  |
| Sample (adjusted): 1982 2019 | | |  |  |
| Included observations: 38 after adjustments | | | |  |
|  |  |  |  |  |
|  |  |  |  |  |
| Variable | Coefficient | Std. Error | t-Statistic | Prob. |
|  |  |  |  |  |
|  |  |  |  |  |
| D(ELECTCON(-1)) | -1.337024 | 0.145285 | -9.202765 | 0.0000 |
| C | 0.033834 | 0.020960 | 1.614175 | 0.1152 |
|  |  |  |  |  |
|  |  |  |  |  |
| R-squared | 0.701717 | Mean dependent var | | 0.007815 |
| Adjusted R-squared | 0.693432 | S.D. dependent var | | 0.231229 |
| S.E. of regression | 0.128028 | Akaike info criterion | | -1.221935 |
| Sum squared resid | 0.590085 | Schwarz criterion | | -1.135746 |
| Log likelihood | 25.21676 | Hannan-Quinn criter. | | -1.191269 |
| F-statistic | 84.69088 | Durbin-Watson stat | | 1.709987 |
| Prob(F-statistic) | 0.000000 |  |  |  |
|  |  |  |  |  |
|  |  |  |  |  |

| Null Hypothesis: INF has a unit root | | | |  |
| --- | --- | --- | --- | --- |
| Exogenous: Constant | | |  |  |
| Bandwidth: 4 (Newey-West automatic) using Bartlett kernel | | | | |
|  |  |  |  |  |
|  |  |  |  |  |
|  |  |  | Adj. t-Stat | Prob.* |
|  |  |  |  |  |
|  |  |  |  |  |
| Phillips-Perron test statistic | | | -2.892042 | 0.0554 |
| Test critical values: | 1% level |  | -3.610453 |  |
|  | 5% level |  | -2.938987 |  |
|  | 10% level |  | -2.607932 |  |
|  |  |  |  |  |
|  |  |  |  |  |
| *MacKinnon (1996) one-sided p-values. | | | |  |
|  |  |  |  |  |
|  |  |  |  |  |
|  |  |  |  |  |
| Residual variance (no correction) | | | | 177.5960 |
| HAC corrected variance (Bartlett kernel) | | | | 161.7447 |
|  |  |  |  |  |
|  |  |  |  |  |
|  |  |  |  |  |
|  |  |  |  |  |
| Phillips-Perron Test Equation | | |  |  |
| Dependent Variable: D(INF) | | |  |  |
| Method: Least Squares | | |  |  |
| Date: 04/27/21 Time: 17:04 | | |  |  |
| Sample (adjusted): 1981 2019 | | |  |  |
| Included observations: 39 after adjustments | | | |  |
|  |  |  |  |  |
|  |  |  |  |  |
| Variable | Coefficient | Std. Error | t-Statistic | Prob. |
|  |  |  |  |  |
|  |  |  |  |  |
| INF(-1) | -0.386282 | 0.129637 | -2.979729 | 0.0051 |
| C | 7.334141 | 3.288647 | 2.230139 | 0.0319 |
|  |  |  |  |  |
|  |  |  |  |  |
| R-squared | 0.193527 | Mean dependent var | | 0.026021 |
| Adjusted R-squared | 0.171730 | S.D. dependent var | | 15.03357 |
| S.E. of regression | 13.68195 | Akaike info criterion | | 8.119952 |
| Sum squared resid | 6926.243 | Schwarz criterion | | 8.205263 |
| Log likelihood | -156.3391 | Hannan-Quinn criter. | | 8.150561 |
| F-statistic | 8.878782 | Durbin-Watson stat | | 1.642727 |
| Prob(F-statistic) | 0.005073 |  |  |  |
|  |  |  |  |  |
|  |  |  |  |  |

| Null Hypothesis: D(INF) has a unit root | | | |  |
| --- | --- | --- | --- | --- |
| Exogenous: Constant | | |  |  |
| Bandwidth: 37 (Newey-West automatic) using Bartlett kernel | | | | |
|  |  |  |  |  |
|  |  |  |  |  |
|  |  |  | Adj. t-Stat | Prob.* |
|  |  |  |  |  |
|  |  |  |  |  |
| Phillips-Perron test statistic | | | -11.93167 | 0.0000 |
| Test critical values: | 1% level |  | -3.615588 |  |
|  | 5% level |  | -2.941145 |  |
|  | 10% level |  | -2.609066 |  |
|  |  |  |  |  |
|  |  |  |  |  |
| *MacKinnon (1996) one-sided p-values. | | | |  |
|  |  |  |  |  |
|  |  |  |  |  |
|  |  |  |  |  |
| Residual variance (no correction) | | | | 222.6310 |
| HAC corrected variance (Bartlett kernel) | | | | 13.98353 |
|  |  |  |  |  |
|  |  |  |  |  |
|  |  |  |  |  |
|  |  |  |  |  |
| Phillips-Perron Test Equation | | |  |  |
| Dependent Variable: D(INF,2) | | |  |  |
| Method: Least Squares | | |  |  |
| Date: 04/27/21 Time: 17:05 | | |  |  |
| Sample (adjusted): 1982 2019 | | |  |  |
| Included observations: 38 after adjustments | | | |  |
|  |  |  |  |  |
|  |  |  |  |  |
| Variable | Coefficient | Std. Error | t-Statistic | Prob. |
|  |  |  |  |  |
|  |  |  |  |  |
| D(INF(-1)) | -0.968902 | 0.165418 | -5.857288 | 0.0000 |
| C | -0.259060 | 2.486805 | -0.104174 | 0.9176 |
|  |  |  |  |  |
|  |  |  |  |  |
| R-squared | 0.487966 | Mean dependent var | | -0.274264 |
| Adjusted R-squared | 0.473743 | S.D. dependent var | | 21.13169 |
| S.E. of regression | 15.32969 | Akaike info criterion | | 8.348656 |
| Sum squared resid | 8459.976 | Schwarz criterion | | 8.434844 |
| Log likelihood | -156.6245 | Hannan-Quinn criter. | | 8.379321 |
| F-statistic | 34.30783 | Durbin-Watson stat | | 1.919386 |
| Prob(F-statistic) | 0.000001 |  |  |  |
|  |  |  |  |  |
|  |  |  |  |  |

| Null Hypothesis: INT has a unit root | | | |  |
| --- | --- | --- | --- | --- |
| Exogenous: Constant | | |  |  |
| Bandwidth: 4 (Newey-West automatic) using Bartlett kernel | | | | |
|  |  |  |  |  |
|  |  |  |  |  |
|  |  |  | Adj. t-Stat | Prob.* |
|  |  |  |  |  |
|  |  |  |  |  |
| Phillips-Perron test statistic | | | -2.406527 | 0.1466 |
| Test critical values: | 1% level |  | -3.610453 |  |
|  | 5% level |  | -2.938987 |  |
|  | 10% level |  | -2.607932 |  |
|  |  |  |  |  |
|  |  |  |  |  |
| *MacKinnon (1996) one-sided p-values. | | | |  |
|  |  |  |  |  |
|  |  |  |  |  |
|  |  |  |  |  |
| Residual variance (no correction) | | | | 7.424358 |
| HAC corrected variance (Bartlett kernel) | | | | 7.143408 |
|  |  |  |  |  |
|  |  |  |  |  |
|  |  |  |  |  |
|  |  |  |  |  |
| Phillips-Perron Test Equation | | |  |  |
| Dependent Variable: D(INT) | | |  |  |
| Method: Least Squares | | |  |  |
| Date: 04/27/21 Time: 17:06 | | |  |  |
| Sample (adjusted): 1981 2019 | | |  |  |
| Included observations: 39 after adjustments | | | |  |
|  |  |  |  |  |
|  |  |  |  |  |
| Variable | Coefficient | Std. Error | t-Statistic | Prob. |
|  |  |  |  |  |
|  |  |  |  |  |
| INT(-1) | -0.220065 | 0.090720 | -2.425758 | 0.0203 |
| C | 4.057239 | 1.647521 | 2.462633 | 0.0186 |
|  |  |  |  |  |
|  |  |  |  |  |
| R-squared | 0.137213 | Mean dependent var | | 0.211309 |
| Adjusted R-squared | 0.113895 | S.D. dependent var | | 2.971791 |
| S.E. of regression | 2.797441 | Akaike info criterion | | 4.945207 |
| Sum squared resid | 289.5500 | Schwarz criterion | | 5.030518 |
| Log likelihood | -94.43154 | Hannan-Quinn criter. | | 4.975816 |
| F-statistic | 5.884304 | Durbin-Watson stat | | 2.116528 |
| Prob(F-statistic) | 0.020271 |  |  |  |
|  |  |  |  |  |
|  |  |  |  |  |

| Null Hypothesis: D(INT) has a unit root | | | |  |
| --- | --- | --- | --- | --- |
| Exogenous: Constant | | |  |  |
| Bandwidth: 4 (Newey-West automatic) using Bartlett kernel | | | | |
|  |  |  |  |  |
|  |  |  |  |  |
|  |  |  | Adj. t-Stat | Prob.* |
|  |  |  |  |  |
|  |  |  |  |  |
| Phillips-Perron test statistic | | | -6.921239 | 0.0000 |
| Test critical values: | 1% level |  | -3.615588 |  |
|  | 5% level |  | -2.941145 |  |
|  | 10% level |  | -2.609066 |  |
|  |  |  |  |  |
|  |  |  |  |  |
| *MacKinnon (1996) one-sided p-values. | | | |  |
|  |  |  |  |  |
|  |  |  |  |  |
|  |  |  |  |  |
| Residual variance (no correction) | | | | 8.657008 |
| HAC corrected variance (Bartlett kernel) | | | | 8.370002 |
|  |  |  |  |  |
|  |  |  |  |  |
|  |  |  |  |  |
|  |  |  |  |  |
| Phillips-Perron Test Equation | | |  |  |
| Dependent Variable: D(INT,2) | | |  |  |
| Method: Least Squares | | |  |  |
| Date: 04/27/21 Time: 17:07 | | |  |  |
| Sample (adjusted): 1982 2019 | | |  |  |
| Included observations: 38 after adjustments | | | |  |
|  |  |  |  |  |
|  |  |  |  |  |
| Variable | Coefficient | Std. Error | t-Statistic | Prob. |
|  |  |  |  |  |
|  |  |  |  |  |
| D(INT(-1)) | -1.139773 | 0.165024 | -6.906719 | 0.0000 |
| C | 0.234449 | 0.491687 | 0.476826 | 0.6364 |
|  |  |  |  |  |
|  |  |  |  |  |
| R-squared | 0.569907 | Mean dependent var | | -0.012982 |
| Adjusted R-squared | 0.557960 | S.D. dependent var | | 4.546671 |
| S.E. of regression | 3.022905 | Akaike info criterion | | 5.101509 |
| Sum squared resid | 328.9663 | Schwarz criterion | | 5.187698 |
| Log likelihood | -94.92868 | Hannan-Quinn criter. | | 5.132175 |
| F-statistic | 47.70277 | Durbin-Watson stat | | 2.058848 |
| Prob(F-statistic) | 0.000000 |  |  |  |
|  |  |  |  |  |
|  |  |  |  |  |

| Null Hypothesis: LAB has a unit root | | | |  |
| --- | --- | --- | --- | --- |
| Exogenous: Constant | | |  |  |
| Bandwidth: 2 (Newey-West automatic) using Bartlett kernel | | | | |
|  |  |  |  |  |
|  |  |  |  |  |
|  |  |  | Adj. t-Stat | Prob.* |
|  |  |  |  |  |
|  |  |  |  |  |
| Phillips-Perron test statistic | | | -5.735297 | 0.0000 |
| Test critical values: | 1% level |  | -3.610453 |  |
|  | 5% level |  | -2.938987 |  |
|  | 10% level |  | -2.607932 |  |
|  |  |  |  |  |
|  |  |  |  |  |
| *MacKinnon (1996) one-sided p-values. | | | |  |
|  |  |  |  |  |
|  |  |  |  |  |
|  |  |  |  |  |
| Residual variance (no correction) | | | | 0.132276 |
| HAC corrected variance (Bartlett kernel) | | | | 0.133361 |
|  |  |  |  |  |
|  |  |  |  |  |
|  |  |  |  |  |
|  |  |  |  |  |
| Phillips-Perron Test Equation | | |  |  |
| Dependent Variable: D(LAB) | | |  |  |
| Method: Least Squares | | |  |  |
| Date: 04/27/21 Time: 17:12 | | |  |  |
| Sample (adjusted): 1981 2019 | | |  |  |
| Included observations: 39 after adjustments | | | |  |
|  |  |  |  |  |
|  |  |  |  |  |
| Variable | Coefficient | Std. Error | t-Statistic | Prob. |
|  |  |  |  |  |
|  |  |  |  |  |
| LAB(-1) | -0.940189 | 0.163990 | -5.733222 | 0.0000 |
| C | 16.35124 | 2.851223 | 5.734816 | 0.0000 |
|  |  |  |  |  |
|  |  |  |  |  |
| R-squared | 0.470444 | Mean dependent var | | 0.008140 |
| Adjusted R-squared | 0.456132 | S.D. dependent var | | 0.506320 |
| S.E. of regression | 0.373398 | Akaike info criterion | | 0.917578 |
| Sum squared resid | 5.158771 | Schwarz criterion | | 1.002889 |
| Log likelihood | -15.89277 | Hannan-Quinn criter. | | 0.948187 |
| F-statistic | 32.86983 | Durbin-Watson stat | | 2.006441 |
| Prob(F-statistic) | 0.000001 |  |  |  |
|  |  |  |  |  |
|  |  |  |  |  |

| Null Hypothesis: D(LAB) has a unit root | | | |  |
| --- | --- | --- | --- | --- |
| Exogenous: Constant, Linear Trend | | | |  |
| Bandwidth: 37 (Newey-West automatic) using Bartlett kernel | | | | |
|  |  |  |  |  |
|  |  |  |  |  |
|  |  |  | Adj. t-Stat | Prob.* |
|  |  |  |  |  |
|  |  |  |  |  |
| Phillips-Perron test statistic | | | -36.40033 | 0.0000 |
| Test critical values: | 1% level |  | -4.219126 |  |
|  | 5% level |  | -3.533083 |  |
|  | 10% level |  | -3.198312 |  |
|  |  |  |  |  |
|  |  |  |  |  |
| *MacKinnon (1996) one-sided p-values. | | | |  |
|  |  |  |  |  |
|  |  |  |  |  |
|  |  |  |  |  |
| Residual variance (no correction) | | | | 0.194365 |
| HAC corrected variance (Bartlett kernel) | | | | 0.008398 |
|  |  |  |  |  |
|  |  |  |  |  |
|  |  |  |  |  |
|  |  |  |  |  |
| Phillips-Perron Test Equation | | |  |  |
| Dependent Variable: D(LAB,2) | | |  |  |
| Method: Least Squares | | |  |  |
| Date: 04/27/21 Time: 17:12 | | |  |  |
| Sample (adjusted): 1982 2019 | | |  |  |
| Included observations: 38 after adjustments | | | |  |
|  |  |  |  |  |
|  |  |  |  |  |
| Variable | Coefficient | Std. Error | t-Statistic | Prob. |
|  |  |  |  |  |
|  |  |  |  |  |
| D(LAB(-1)) | -1.491766 | 0.147198 | -10.13441 | 0.0000 |
| C | 0.011084 | 0.157994 | 0.070157 | 0.9445 |
| @TREND("1980") | 5.23E-05 | 0.006796 | 0.007700 | 0.9939 |
|  |  |  |  |  |
|  |  |  |  |  |
| R-squared | 0.745836 | Mean dependent var | | -0.001855 |
| Adjusted R-squared | 0.731313 | S.D. dependent var | | 0.886222 |
| S.E. of regression | 0.459374 | Akaike info criterion | | 1.357753 |
| Sum squared resid | 7.385857 | Schwarz criterion | | 1.487036 |
| Log likelihood | -22.79730 | Hannan-Quinn criter. | | 1.403751 |
| F-statistic | 51.35323 | Durbin-Watson stat | | 2.184529 |
| Prob(F-statistic) | 0.000000 |  |  |  |
|  |  |  |  |  |
|  |  |  |  |  |

| Null Hypothesis: GFCF has a unit root | | | |  |
| --- | --- | --- | --- | --- |
| Exogenous: Constant, Linear Trend | | | |  |
| Bandwidth: 1 (Newey-West automatic) using Bartlett kernel | | | | |
|  |  |  |  |  |
|  |  |  |  |  |
|  |  |  | Adj. t-Stat | Prob.* |
|  |  |  |  |  |
|  |  |  |  |  |
| Phillips-Perron test statistic | | | -2.565967 | 0.2970 |
| Test critical values: | 1% level |  | -4.211868 |  |
|  | 5% level |  | -3.529758 |  |
|  | 10% level |  | -3.196411 |  |
|  |  |  |  |  |
|  |  |  |  |  |
| *MacKinnon (1996) one-sided p-values. | | | |  |
|  |  |  |  |  |
|  |  |  |  |  |
|  |  |  |  |  |
| Residual variance (no correction) | | | | 0.108930 |
| HAC corrected variance (Bartlett kernel) | | | | 0.122425 |
|  |  |  |  |  |
|  |  |  |  |  |
|  |  |  |  |  |
|  |  |  |  |  |
| Phillips-Perron Test Equation | | |  |  |
| Dependent Variable: D(GFCF) | | |  |  |
| Method: Least Squares | | |  |  |
| Date: 04/27/21 Time: 17:13 | | |  |  |
| Sample (adjusted): 1981 2019 | | |  |  |
| Included observations: 39 after adjustments | | | |  |
|  |  |  |  |  |
|  |  |  |  |  |
| Variable | Coefficient | Std. Error | t-Statistic | Prob. |
|  |  |  |  |  |
|  |  |  |  |  |
| GFCF(-1) | -0.288762 | 0.118040 | -2.446300 | 0.0194 |
| C | 6.740893 | 2.739970 | 2.460207 | 0.0188 |
| @TREND("1980") | 0.012025 | 0.006793 | 1.770236 | 0.0852 |
|  |  |  |  |  |
|  |  |  |  |  |
| R-squared | 0.142739 | Mean dependent var | | 0.053414 |
| Adjusted R-squared | 0.095113 | S.D. dependent var | | 0.361125 |
| S.E. of regression | 0.343522 | Akaike info criterion | | 0.774673 |
| Sum squared resid | 4.248268 | Schwarz criterion | | 0.902639 |
| Log likelihood | -12.10612 | Hannan-Quinn criter. | | 0.820586 |
| F-statistic | 2.997106 | Durbin-Watson stat | | 1.121830 |
| Prob(F-statistic) | 0.062522 |  |  |  |
|  |  |  |  |  |
|  |  |  |  |  |

| Null Hypothesis: D(GFCF) has a unit root | | | |  |
| --- | --- | --- | --- | --- |
| Exogenous: Constant | | |  |  |
| Bandwidth: 3 (Newey-West automatic) using Bartlett kernel | | | | |
|  |  |  |  |  |
|  |  |  |  |  |
|  |  |  | Adj. t-Stat | Prob.* |
|  |  |  |  |  |
|  |  |  |  |  |
| Phillips-Perron test statistic | | | -8.921417 | 0.0000 |
| Test critical values: | 1% level |  | -3.615588 |  |
|  | 5% level |  | -2.941145 |  |
|  | 10% level |  | -2.609066 |  |
|  |  |  |  |  |
|  |  |  |  |  |
| *MacKinnon (1996) one-sided p-values. | | | |  |
|  |  |  |  |  |
|  |  |  |  |  |
|  |  |  |  |  |
| Residual variance (no correction) | | | | 0.054162 |
| HAC corrected variance (Bartlett kernel) | | | | 0.068086 |
|  |  |  |  |  |
|  |  |  |  |  |
|  |  |  |  |  |
|  |  |  |  |  |
| Phillips-Perron Test Equation | | |  |  |
| Dependent Variable: D(GFCF,2) | | |  |  |
| Method: Least Squares | | |  |  |
| Date: 04/27/21 Time: 17:13 | | |  |  |
| Sample (adjusted): 1982 2019 | | |  |  |
| Included observations: 38 after adjustments | | | |  |
|  |  |  |  |  |
|  |  |  |  |  |
| Variable | Coefficient | Std. Error | t-Statistic | Prob. |
|  |  |  |  |  |
|  |  |  |  |  |
| D(GFCF(-1)) | -1.019669 | 0.107425 | -9.491906 | 0.0000 |
| C | 0.010243 | 0.039194 | 0.261339 | 0.7953 |
|  |  |  |  |  |
|  |  |  |  |  |
| R-squared | 0.714504 | Mean dependent var | | -0.043192 |
| Adjusted R-squared | 0.706573 | S.D. dependent var | | 0.441407 |
| S.E. of regression | 0.239105 | Akaike info criterion | | 0.027368 |
| Sum squared resid | 2.058164 | Schwarz criterion | | 0.113557 |
| Log likelihood | 1.479999 | Hannan-Quinn criter. | | 0.058034 |
| F-statistic | 90.09628 | Durbin-Watson stat | | 1.484694 |
| Prob(F-statistic) | 0.000000 |  |  |  |
|  |  |  |  |  |
|  |  |  |  |  |

| Null Hypothesis: EXCH has a unit root | | | |  |
| --- | --- | --- | --- | --- |
| Exogenous: Constant | | |  |  |
| Bandwidth: 4 (Newey-West automatic) using Bartlett kernel | | | | |
|  |  |  |  |  |
|  |  |  |  |  |
|  |  |  | Adj. t-Stat | Prob.* |
|  |  |  |  |  |
|  |  |  |  |  |
| Phillips-Perron test statistic | | | 1.419930 | 0.9988 |
| Test critical values: | 1% level |  | -3.610453 |  |
|  | 5% level |  | -2.938987 |  |
|  | 10% level |  | -2.607932 |  |
|  |  |  |  |  |
|  |  |  |  |  |
| *MacKinnon (1996) one-sided p-values. | | | |  |
|  |  |  |  |  |
|  |  |  |  |  |
|  |  |  |  |  |
| Residual variance (no correction) | | | | 282.0049 |
| HAC corrected variance (Bartlett kernel) | | | | 293.2721 |
|  |  |  |  |  |
|  |  |  |  |  |
|  |  |  |  |  |
|  |  |  |  |  |
| Phillips-Perron Test Equation | | |  |  |
| Dependent Variable: D(EXCH) | | |  |  |
| Method: Least Squares | | |  |  |
| Date: 04/27/21 Time: 17:14 | | |  |  |
| Sample (adjusted): 1981 2019 | | |  |  |
| Included observations: 39 after adjustments | | | |  |
|  |  |  |  |  |
|  |  |  |  |  |
| Variable | Coefficient | Std. Error | t-Statistic | Prob. |
|  |  |  |  |  |
|  |  |  |  |  |
| EXCH(-1) | 0.047262 | 0.032099 | 1.472376 | 0.1494 |
| C | 3.777079 | 3.910669 | 0.965840 | 0.3404 |
|  |  |  |  |  |
|  |  |  |  |  |
| R-squared | 0.055349 | Mean dependent var | | 7.855211 |
| Adjusted R-squared | 0.029818 | S.D. dependent var | | 17.50383 |
| S.E. of regression | 17.24089 | Akaike info criterion | | 8.582366 |
| Sum squared resid | 10998.19 | Schwarz criterion | | 8.667677 |
| Log likelihood | -165.3561 | Hannan-Quinn criter. | | 8.612975 |
| F-statistic | 2.167892 | Durbin-Watson stat | | 1.498775 |
| Prob(F-statistic) | 0.149375 |  |  |  |
|  |  |  |  |  |
|  |  |  |  |  |

| Null Hypothesis: D(EXCH) has a unit root | | | |  |
| --- | --- | --- | --- | --- |
| Exogenous: Constant | | |  |  |
| Bandwidth: 4 (Newey-West automatic) using Bartlett kernel | | | | |
|  |  |  |  |  |
|  |  |  |  |  |
|  |  |  | Adj. t-Stat | Prob.* |
|  |  |  |  |  |
|  |  |  |  |  |
| Phillips-Perron test statistic | | | -4.202387 | 0.0021 |
| Test critical values: | 1% level |  | -3.615588 |  |
|  | 5% level |  | -2.941145 |  |
|  | 10% level |  | -2.609066 |  |
|  |  |  |  |  |
|  |  |  |  |  |
| *MacKinnon (1996) one-sided p-values. | | | |  |
|  |  |  |  |  |
|  |  |  |  |  |
|  |  |  |  |  |
| Residual variance (no correction) | | | | 273.1451 |
| HAC corrected variance (Bartlett kernel) | | | | 237.2734 |
|  |  |  |  |  |
|  |  |  |  |  |
|  |  |  |  |  |
|  |  |  |  |  |
| Phillips-Perron Test Equation | | |  |  |
| Dependent Variable: D(EXCH,2) | | |  |  |
| Method: Least Squares | | |  |  |
| Date: 04/27/21 Time: 17:14 | | |  |  |
| Sample (adjusted): 1982 2019 | | |  |  |
| Included observations: 38 after adjustments | | | |  |
|  |  |  |  |  |
|  |  |  |  |  |
| Variable | Coefficient | Std. Error | t-Statistic | Prob. |
|  |  |  |  |  |
|  |  |  |  |  |
| D(EXCH(-1)) | -0.678129 | 0.157713 | -4.299767 | 0.0001 |
| C | 5.471934 | 3.032419 | 1.804478 | 0.0795 |
|  |  |  |  |  |
|  |  |  |  |  |
| R-squared | 0.339304 | Mean dependent var | | 0.019186 |
| Adjusted R-squared | 0.320951 | S.D. dependent var | | 20.60567 |
| S.E. of regression | 16.97998 | Akaike info criterion | | 8.553143 |
| Sum squared resid | 10379.51 | Schwarz criterion | | 8.639332 |
| Log likelihood | -160.5097 | Hannan-Quinn criter. | | 8.583809 |
| F-statistic | 18.48800 | Durbin-Watson stat | | 1.948425 |
| Prob(F-statistic) | 0.000125 |  |  |  |
|  |  |  |  |  |
|  |  |  |  |  |

| Null Hypothesis: ELECTP has a unit root | | | |  |
| --- | --- | --- | --- | --- |
| Exogenous: Constant | | |  |  |
| Bandwidth: 1 (Newey-West automatic) using Bartlett kernel | | | | |
|  |  |  |  |  |
|  |  |  |  |  |
|  |  |  | Adj. t-Stat | Prob.* |
|  |  |  |  |  |
|  |  |  |  |  |
| Phillips-Perron test statistic | | | -1.375059 | 0.5845 |
| Test critical values: | 1% level |  | -3.610453 |  |
|  | 5% level |  | -2.938987 |  |
|  | 10% level |  | -2.607932 |  |
|  |  |  |  |  |
|  |  |  |  |  |
| *MacKinnon (1996) one-sided p-values. | | | |  |
|  |  |  |  |  |
|  |  |  |  |  |
|  |  |  |  |  |
| Residual variance (no correction) | | | | 10.13463 |
| HAC corrected variance (Bartlett kernel) | | | | 9.522821 |
|  |  |  |  |  |
|  |  |  |  |  |
|  |  |  |  |  |
|  |  |  |  |  |
| Phillips-Perron Test Equation | | |  |  |
| Dependent Variable: D(ELECTP) | | |  |  |
| Method: Least Squares | | |  |  |
| Date: 04/27/21 Time: 17:15 | | |  |  |
| Sample (adjusted): 1981 2019 | | |  |  |
| Included observations: 39 after adjustments | | | |  |
|  |  |  |  |  |
|  |  |  |  |  |
| Variable | Coefficient | Std. Error | t-Statistic | Prob. |
|  |  |  |  |  |
|  |  |  |  |  |
| ELECTP(-1) | -0.108199 | 0.076182 | -1.420259 | 0.1639 |
| C | 2.837876 | 2.382981 | 1.190894 | 0.2413 |
|  |  |  |  |  |
|  |  |  |  |  |
| R-squared | 0.051699 | Mean dependent var | | -0.463939 |
| Adjusted R-squared | 0.026069 | S.D. dependent var | | 3.311854 |
| S.E. of regression | 3.268401 | Akaike info criterion | | 5.256399 |
| Sum squared resid | 395.2504 | Schwarz criterion | | 5.341710 |
| Log likelihood | -100.4998 | Hannan-Quinn criter. | | 5.287008 |
| F-statistic | 2.017135 | Durbin-Watson stat | | 2.006262 |
| Prob(F-statistic) | 0.163905 |  |  |  |
|  |  |  |  |  |
|  |  |  |  |  |

| Null Hypothesis: D(ELECTP) has a unit root | | | |  |
| --- | --- | --- | --- | --- |
| Exogenous: Constant | | |  |  |
| Bandwidth: 1 (Newey-West automatic) using Bartlett kernel | | | | |
|  |  |  |  |  |
|  |  |  |  |  |
|  |  |  | Adj. t-Stat | Prob.* |
|  |  |  |  |  |
|  |  |  |  |  |
| Phillips-Perron test statistic | | | -7.498755 | 0.0000 |
| Test critical values: | 1% level |  | -3.615588 |  |
|  | 5% level |  | -2.941145 |  |
|  | 10% level |  | -2.609066 |  |
|  |  |  |  |  |
|  |  |  |  |  |
| *MacKinnon (1996) one-sided p-values. | | | |  |
|  |  |  |  |  |
|  |  |  |  |  |
|  |  |  |  |  |
| Residual variance (no correction) | | | | 9.185842 |
| HAC corrected variance (Bartlett kernel) | | | | 8.877701 |
|  |  |  |  |  |
|  |  |  |  |  |
|  |  |  |  |  |
|  |  |  |  |  |
| Phillips-Perron Test Equation | | |  |  |
| Dependent Variable: D(ELECTP,2) | | | |  |
| Method: Least Squares | | |  |  |
| Date: 04/27/21 Time: 17:16 | | |  |  |
| Sample (adjusted): 1982 2019 | | |  |  |
| Included observations: 38 after adjustments | | | |  |
|  |  |  |  |  |
|  |  |  |  |  |
| Variable | Coefficient | Std. Error | t-Statistic | Prob. |
|  |  |  |  |  |
|  |  |  |  |  |
| D(ELECTP(-1)) | -1.139857 | 0.152661 | -7.466613 | 0.0000 |
| C | -0.331428 | 0.510564 | -0.649141 | 0.5204 |
|  |  |  |  |  |
|  |  |  |  |  |
| R-squared | 0.607631 | Mean dependent var | | 0.222991 |
| Adjusted R-squared | 0.596732 | S.D. dependent var | | 4.903463 |
| S.E. of regression | 3.113867 | Akaike info criterion | | 5.160804 |
| Sum squared resid | 349.0620 | Schwarz criterion | | 5.246992 |
| Log likelihood | -96.05527 | Hannan-Quinn criter. | | 5.191469 |
| F-statistic | 55.75031 | Durbin-Watson stat | | 2.046916 |
| Prob(F-statistic) | 0.000000 |  |  |  |
|  |  |  |  |  |
|  |  |  |  |  |
